# Supplementary material for: Temporal dynamics of liver mitochondrial protein acetylation and succinylation and metabolites due to high fat diet and/or excess glucose or fructose
Source: PLoS One. 2018 Dec 26;13(12):e0208973. doi: 10.1371/journal.pone.0208973 (PMC6306174; doi:10.1371/journal.pone.0208973)
Supplement: S8 Table — (XLSX) [file pone.0208973.s008.xlsx]

## Sheet: Suppl_TableX_aKsK_10w_over_2w
Supplementary Table 8: Ten-week over two-week changes in acetylation and succinylation (matches figure 4C).
Values indicate log2(fold-change), changes are filtered for FDR<0.01 and at least 2-fold increase or decrease. NA = not significant
The ordering matches figure 4C, where the top of this table is the left of the heatmap.
			Acetylation						Succinylation
UniprotID_site#	geneid	uniprot	10wCon/2wCon	10wFruc/2wFruc	10wGluc/2wGluc	10wHFD/2wHFD	10wHFDfruc/2wHFDfruc	10wHFDgluc/2wHFDgluc	10wCon/2wCon	10wFruc/2wFruc	10wGluc/2wGluc	10wHFD/2wHFD	10wHFDfruc/2wHFDfruc	10wHFDgluc/2wHFDgluc
P63276_19	Rps17	P63276	NA	NA	NA	NA	NA	NA	NA	-1.51466	-1.83635	-1.25054	-2.06283	-3.23497
Q99LC5_206	Etfa	Q99LC5	NA	NA	NA	NA	NA	NA	NA	-1.5933	-1.44221	NA	-1.32371	-2.35397
P11352_86	Gpx1	P11352	NA	NA	NA	NA	NA	NA	NA	-2.0704	NA	NA	-2.01184	-2.61337
Q8BMS1_460	Hadha	Q8BMS1	NA	NA	NA	NA	NA	NA	NA	-1.95177	NA	NA	-2.25065	-2.58139
P54869_342	Hmgcs2	P54869	NA	NA	1.0243	-1.04843	NA	NA	NA	-1.62662	-1.52275	-1.27965	-1.26362	-2.03452
P56382_44	Atp5f1e	P56382	NA	NA	NA	-1.6795	-1.14669	NA	NA	-1.52856	-1.66901	-1.29972	-1.49049	-1.74275
P54869_333	Hmgcs2	P54869	NA	NA	1.44464	NA	NA	1.12782	-1.12921	-1.66773	-1.67105	-1.0395	-1.70235	-1.97753
P51881_43	Slc25a5	P51881	NA	NA	NA	NA	NA	NA	-1.24846	-1.25818	-1.13574	-1.04496	-1.22279	-2.13761
Q64433_56	Hspe1	Q64433	NA	NA	NA	NA	NA	NA	-1.02024	-1.30273	-1.68335	-1.18069	-1.37055	-1.88607
Q91VS7_55	Mgst1	Q91VS7	NA	NA	NA	NA	NA	NA	-1.00354	-1.33286	-1.6002	-1.43532	-1.68322	-2.18393
Q9CZU6_76	Cs	Q9CZU6	NA	NA	NA	NA	NA	NA	NA	NA	NA	-1.76946	-1.31636	NA
O55125_279	Nipsnap1	O55125	NA	NA	NA	NA	NA	NA	NA	NA	NA	-1.04988	-1.01029	NA
P03930_57	Mtatp8	P03930	NA	NA	NA	NA	NA	NA	NA	NA	NA	-1.00064	-1.07512	NA
P53026_106	Rpl10a	P53026	NA	NA	NA	NA	NA	NA	NA	NA	NA	-1.23486	-1.32066	NA
Q9DCW4_210	Etfb	Q9DCW4	NA	NA	NA	NA	NA	NA	NA	NA	NA	-1.17102	-1.37791	NA
P51660_84	Hsd17b4	P51660	NA	NA	NA	NA	NA	NA	-1.00807	NA	NA	-1.19273	-1.74071	-1.10311
Q99JY0_362	Hadhb	Q99JY0	NA	NA	NA	NA	NA	NA	NA	NA	NA	-1.02877	-1.70923	-1.19599
Q8BW75_52	Maob	Q8BW75	NA	NA	NA	NA	NA	NA	NA	NA	NA	-1.04884	-1.27547	-1.02436
Q91WS0_55	Cisd1	Q91WS0	NA	NA	NA	NA	NA	NA	NA	NA	NA	-1.12278	-1.21721	-1.24046
Q91Y97_330	Aldob	Q91Y97	NA	NA	NA	NA	NA	NA	NA	NA	NA	-1.10379	-1.10794	-1.22249
Q05920_300	Pc	Q05920	NA	NA	NA	NA	NA	NA	NA	NA	NA	NA	-2.2826	NA
Q9R0H0_260	Acox1	Q9R0H0	NA	NA	NA	NA	NA	NA	NA	NA	NA	NA	-1.85192	NA
P32020_491	Scp2	P32020	NA	NA	NA	NA	NA	NA	NA	NA	NA	NA	-1.83764	NA
P51660_184	Hsd17b4	P51660	NA	NA	NA	NA	NA	NA	NA	NA	NA	NA	-1.827	NA
P32020_470	Scp2	P32020	NA	NA	NA	NA	NA	NA	NA	NA	NA	NA	-1.89645	NA
Q9DBM2_248	Ehhadh	Q9DBM2	NA	NA	NA	NA	NA	NA	NA	NA	NA	NA	-1.90575	NA
P32020_183	Scp2	P32020	NA	NA	NA	NA	NA	NA	NA	NA	NA	NA	-1.93168	NA
P32020_454	Scp2	P32020	NA	NA	NA	NA	NA	NA	NA	NA	NA	NA	-1.9589	NA
Q91VA0_214	Acsm1	Q91VA0	NA	NA	NA	NA	NA	NA	NA	NA	NA	NA	-1.70114	NA
Q9R0H0_216	Acox1	Q9R0H0	NA	NA	NA	NA	NA	NA	NA	NA	NA	NA	-1.73828	NA
Q9R0H0_542	Acox1	Q9R0H0	NA	NA	NA	NA	NA	NA	NA	NA	NA	NA	-1.75199	NA
P32020_522	Scp2	P32020	NA	NA	NA	NA	NA	NA	NA	NA	NA	NA	-1.55028	NA
Q9DBM2_355	Ehhadh	Q9DBM2	NA	NA	NA	NA	NA	NA	NA	NA	NA	NA	-1.55031	NA
P05202_185	Got2	P05202	NA	NA	NA	NA	NA	NA	NA	NA	NA	NA	-1.5419	NA
P32020_453	Scp2	P32020	NA	NA	NA	NA	NA	NA	NA	NA	NA	NA	-1.54341	NA
P32020_544	Scp2	P32020	NA	NA	NA	NA	NA	NA	NA	NA	NA	NA	-1.6224	NA
P51660_706	Hsd17b4	P51660	NA	NA	NA	NA	NA	NA	NA	NA	NA	NA	-1.5962	NA
P25688_122	Uox	P25688	NA	NA	NA	NA	NA	NA	-1.06357	NA	NA	NA	-2.11484	NA
P32020_464	Scp2	P32020	NA	NA	NA	NA	NA	NA	-1.00896	NA	NA	NA	-1.91083	NA
Q9R0H0_349	Acox1	Q9R0H0	NA	NA	NA	NA	NA	NA	-1.06389	NA	NA	NA	-1.80864	NA
Q99KR3_282	Lactb2	Q99KR3	NA	NA	NA	NA	NA	NA	-1.09893	NA	NA	NA	-1.36836	NA
P24270_430	Cat	P24270	NA	NA	NA	NA	NA	NA	-1.1109	NA	NA	NA	-1.64852	NA
Q9CPY7_476	Lap3	Q9CPY7	NA	NA	NA	NA	NA	NA	-1.27821	NA	NA	NA	-1.64604	NA
P56382_32	Atp5f1e	P56382	NA	NA	NA	-1.64037	NA	NA	NA	NA	NA	NA	-1.17751	NA
Q9D855_12	Uqcrb	Q9D855	NA	NA	NA	-1.01388	NA	NA	NA	NA	NA	NA	-1.42167	NA
Q91YQ5_188	Rpn1	Q91YQ5	NA	NA	NA	NA	-1.01067	NA	NA	NA	NA	NA	-1.22996	NA
Q99LB7_776	Sardh	Q99LB7	NA	NA	NA	NA	NA	NA	NA	NA	NA	NA	-1.1513	NA
P24270_499	Cat	P24270	NA	NA	NA	NA	NA	NA	NA	NA	NA	NA	-1.11372	NA
Q9Z2I8_219	Suclg2	Q9Z2I8	NA	NA	NA	NA	NA	NA	NA	NA	NA	NA	-1.11737	NA
P34914_473	Ephx2	P34914	NA	NA	NA	NA	NA	NA	NA	NA	NA	NA	-1.12544	NA
P47738_453	Aldh2	P47738	NA	NA	NA	NA	NA	NA	NA	NA	NA	NA	-1.1211	NA
P35486_277	Pdha1	P35486	NA	NA	NA	NA	NA	NA	NA	NA	NA	NA	-1.02628	NA
P50544_196	Acadvl	P50544	NA	NA	NA	NA	NA	NA	NA	NA	NA	NA	-1.02508	NA
P17665_34	Cox7c	P17665	NA	NA	NA	NA	NA	NA	NA	NA	NA	NA	-1.00221	NA
Q99J39_385	Mlycd	Q99J39	NA	NA	NA	NA	NA	NA	NA	NA	NA	NA	-1.01161	NA
Q9DCN2_42	Cyb5r3	Q9DCN2	NA	NA	NA	NA	NA	NA	NA	NA	NA	NA	-1.01319	NA
P55096_289	Abcd3	P55096	NA	NA	NA	NA	NA	NA	NA	NA	NA	NA	-1.05698	NA
P50544_279	Acadvl	P50544	NA	NA	NA	NA	NA	NA	NA	NA	NA	NA	-1.04582	NA
P54071_166	Idh2	P54071	NA	NA	NA	NA	NA	NA	NA	NA	NA	NA	-1.04096	NA
P12787_68	Cox5a	P12787	NA	NA	NA	NA	NA	NA	NA	NA	NA	NA	-1.0955	NA
P16460_239	Ass1	P16460	NA	NA	NA	NA	NA	NA	NA	NA	NA	NA	-1.06872	NA
Q91VM9_211	Ppa2	Q91VM9	NA	NA	NA	NA	NA	NA	NA	NA	NA	NA	-1.07346	NA
Q91VS7_42	Mgst1	Q91VS7	NA	NA	NA	NA	NA	NA	NA	NA	NA	NA	-1.25835	NA
Q9R0H0_267	Acox1	Q9R0H0	NA	NA	NA	NA	NA	NA	NA	NA	NA	NA	-1.25791	NA
P24270_233	Cat	P24270	NA	NA	NA	NA	NA	NA	NA	NA	NA	NA	-1.27449	NA
Q9DBM2_572	Ehhadh	Q9DBM2	NA	NA	NA	NA	NA	NA	NA	NA	NA	NA	-1.26621	NA
Q9Z0X1_387	Aifm1	Q9Z0X1	NA	NA	NA	NA	NA	NA	NA	NA	NA	NA	-1.2272	NA
P25688_126	Uox	P25688	NA	NA	NA	NA	NA	NA	NA	NA	NA	NA	-1.24527	NA
Q9CZS1_54	Aldh1b1	Q9CZS1	NA	NA	NA	NA	NA	NA	NA	NA	NA	NA	-1.24154	NA
P34914_482	Ephx2	P34914	NA	NA	NA	NA	NA	NA	NA	NA	NA	NA	-1.46042	NA
P32020_443	Scp2	P32020	NA	NA	NA	NA	NA	NA	NA	NA	NA	NA	-1.45097	NA
Q8VCT4_382	Ces1d	Q8VCT4	NA	NA	NA	NA	NA	NA	NA	NA	NA	NA	-1.45547	NA
P55096_61	Abcd3	P55096	NA	NA	NA	NA	NA	NA	NA	NA	NA	NA	-1.38822	NA
Q80XL6_390	Acad11	Q80XL6	NA	NA	NA	NA	NA	NA	NA	NA	NA	NA	-1.3629	NA
Q9DBM2_611	Ehhadh	Q9DBM2	NA	NA	NA	NA	NA	NA	NA	NA	NA	NA	-1.3727	NA
Q9DBM2_189	Ehhadh	Q9DBM2	NA	NA	NA	NA	NA	NA	NA	NA	NA	NA	-1.34826	NA
Q9R0H0_500	Acox1	Q9R0H0	NA	NA	NA	NA	NA	NA	NA	NA	NA	NA	-1.34025	NA
Q9DBM2_344	Ehhadh	Q9DBM2	NA	NA	NA	NA	NA	NA	NA	NA	NA	NA	-1.30941	NA
Q8R164_74	Bphl	Q8R164	NA	NA	NA	NA	NA	NA	NA	NA	NA	NA	-1.32743	NA
Q9DBM2_329	Ehhadh	Q9DBM2	NA	NA	NA	NA	NA	NA	NA	NA	NA	NA	-1.32918	NA
P32020_132	Scp2	P32020	NA	NA	NA	NA	-1.30487	NA	-1.11653	NA	NA	NA	-1.91512	-1.44765
O35490_98	Bhmt	O35490	NA	NA	NA	NA	NA	NA	-1.08918	NA	NA	NA	-1.63639	-1.09745
P24270_480	Cat	P24270	NA	NA	NA	NA	NA	NA	-1.03799	NA	NA	NA	-1.70289	-1.09723
P32020_438	Scp2	P32020	NA	NA	NA	NA	NA	NA	-1.05475	NA	NA	NA	-1.71559	-1.10037
P24270_476	Cat	P24270	NA	NA	NA	NA	NA	NA	-1.18387	NA	NA	NA	-1.87826	-1.15015
P25688_80	Uox	P25688	NA	NA	NA	NA	NA	NA	-1.15549	NA	NA	NA	-1.75607	-1.19681
P32020_40	Scp2	P32020	NA	NA	NA	NA	NA	NA	-1.17784	NA	NA	NA	-2.24238	-1.04485
P51660_65	Hsd17b4	P51660	NA	NA	NA	NA	NA	NA	-1.07044	NA	NA	NA	-2.02127	-1.25891
Q91X34_138	Baat	Q91X34	NA	NA	NA	NA	NA	NA	-1.06442	NA	NA	NA	-2.14511	-1.3009
P25688_277	Uox	P25688	NA	NA	NA	NA	NA	NA	NA	NA	NA	NA	-2.24013	-2.04472
P25688_290	Uox	P25688	NA	NA	NA	NA	NA	NA	NA	NA	NA	NA	-2.2432	-2.28281
Q9R0H0_638	Acox1	Q9R0H0	NA	NA	NA	NA	NA	NA	NA	NA	NA	NA	-2.10582	-2.25006
Q9WV68_64	Decr2	Q9WV68	NA	NA	NA	NA	NA	NA	NA	NA	NA	NA	-1.53797	-1.65056
Q91VA0_324	Acsm1	Q91VA0	NA	NA	NA	NA	NA	NA	NA	NA	NA	NA	-1.51396	-2.26065
Q99K67_93	Aass	Q99K67	NA	NA	NA	NA	NA	NA	NA	NA	NA	NA	-1.62809	-2.12749
P25688_72	Uox	P25688	NA	NA	NA	NA	NA	NA	NA	NA	NA	NA	-1.99824	-1.7379
P25688_23	Uox	P25688	NA	NA	NA	NA	NA	NA	NA	NA	NA	NA	-1.98905	-1.43725
P25688_54	Uox	P25688	NA	NA	NA	NA	NA	NA	NA	NA	NA	NA	-1.89093	-1.48889
P51660_57	Hsd17b4	P51660	NA	NA	NA	NA	NA	NA	NA	NA	NA	NA	-2.08365	-1.21423
P25688_227	Uox	P25688	NA	NA	NA	NA	NA	NA	NA	NA	NA	NA	-1.88647	-1.15312
P24270_243	Cat	P24270	NA	NA	NA	NA	NA	NA	NA	NA	NA	NA	-1.95259	-1.20718
P25688_118	Uox	P25688	NA	NA	NA	NA	NA	NA	NA	NA	NA	NA	-1.95142	-1.09991
P24270_449	Cat	P24270	NA	NA	NA	NA	NA	NA	NA	NA	NA	NA	-2.25094	-1.11469
P25688_220	Uox	P25688	NA	NA	NA	NA	NA	NA	NA	NA	NA	NA	-2.43367	-1.24751
P32020_282	Scp2	P32020	NA	NA	NA	NA	NA	NA	NA	NA	NA	NA	-1.6452	-1.02593
P25688_27	Uox	P25688	NA	NA	NA	NA	NA	NA	NA	NA	NA	NA	-1.52678	-1.08549
P32020_479	Scp2	P32020	NA	NA	NA	NA	NA	NA	NA	NA	NA	NA	-1.48024	-1.06938
P32020_26	Scp2	P32020	NA	NA	NA	NA	NA	NA	NA	NA	NA	NA	-1.39198	-1.30026
Q9D826_126	Pipox	Q9D826	NA	NA	NA	NA	NA	NA	NA	NA	NA	NA	-1.51426	-1.28729
P25688_158	Uox	P25688	NA	NA	NA	NA	NA	NA	NA	NA	NA	NA	-1.64604	-1.39788
P51660_68	Hsd17b4	P51660	NA	NA	NA	NA	NA	NA	NA	NA	NA	NA	-1.80121	-1.22966
P24369_67	Ppib	P24369	NA	NA	NA	NA	NA	NA	NA	NA	NA	NA	-1.69971	-1.27268
P25688_185	Uox	P25688	NA	NA	NA	NA	NA	NA	NA	NA	NA	NA	-1.69648	-1.19359
P25688_164	Uox	P25688	NA	NA	NA	NA	NA	NA	NA	NA	NA	NA	-1.29043	-1.54457
P11679_353	Krt8	P11679	NA	NA	NA	NA	NA	NA	NA	NA	NA	NA	-1.04038	-1.46669
P24369_116	Ppib	P24369	NA	NA	NA	NA	NA	NA	NA	NA	NA	NA	-1.02702	-1.56506
Q99LB2_106	Dhrs4	Q99LB2	NA	NA	NA	NA	NA	NA	NA	NA	NA	NA	-1.26452	-1.2751
Q9Z2Z6_158	Slc25a20	Q9Z2Z6	NA	NA	NA	NA	NA	NA	NA	NA	NA	NA	-1.10206	-1.34987
Q91ZA3_258	Pcca	Q91ZA3	NA	NA	NA	NA	NA	NA	NA	NA	NA	NA	-1.01569	-1.24447
P08113_633	Hsp90b1	P08113	NA	NA	NA	NA	NA	NA	NA	NA	NA	NA	-1.02528	-1.09703
P41216_644	Acsl1	P41216	NA	NA	NA	NA	NA	NA	NA	NA	NA	NA	-1.01814	-1.06056
P50544_72	Acadvl	P50544	NA	NA	NA	NA	NA	NA	NA	NA	NA	NA	-1.24455	-1.07781
Q9DBM2_38	Ehhadh	Q9DBM2	NA	NA	NA	NA	NA	NA	NA	NA	NA	NA	-1.12559	-1.1571
Q3UEG6_453	Agxt2	Q3UEG6	NA	NA	NA	NA	NA	NA	NA	NA	NA	NA	-1.14222	-1.07372
Q9EQ20_364	Aldh6a1	Q9EQ20	NA	NA	NA	NA	NA	NA	NA	NA	NA	NA	-1.10842	-1.03118
Q9Z2Z6_202	Slc25a20	Q9Z2Z6	NA	NA	NA	NA	NA	NA	NA	NA	NA	NA	-1.15001	-1.00562
O08749_346	Dld	O08749	NA	NA	NA	NA	NA	NA	NA	NA	NA	NA	NA	-2.8834
P08249_91	Mdh2	P08249	NA	NA	NA	NA	NA	NA	NA	NA	NA	NA	-1.40324	-3.00744
P05202_364	Got2	P05202	NA	NA	NA	NA	NA	NA	NA	NA	-1.65261	NA	-1.55214	-1.94649
Q99JY0_299	Hadhb	Q99JY0	NA	NA	NA	NA	NA	NA	NA	NA	-2.14116	NA	-1.36875	-2.19271
Q8VEM8_290	Slc25a3	Q8VEM8	NA	NA	NA	NA	NA	NA	NA	NA	-1.02524	NA	-1.038	-1.39639
Q9R0H0_643	Acox1	Q9R0H0	NA	NA	NA	NA	NA	NA	NA	NA	-1.22868	NA	-2.00979	-1.65338
P54071_106	Idh2	P54071	NA	NA	NA	NA	NA	NA	NA	-1.84432	NA	-2.28635	NA	-1.62306
P03930_48	Mtatp8	P03930	NA	NA	NA	NA	NA	NA	-1.06811	-1.09115	NA	-1.02605	NA	-1.57184
Q99KR7_182	Ppif	Q99KR7	NA	NA	NA	NA	NA	NA	-1.0393	-1.12353	NA	NA	NA	-1.38071
Q61425_312	Hadh	Q61425	NA	NA	NA	NA	NA	NA	NA	-1.7201	NA	NA	-1.05575	-2.00402
Q8C196_811	Cps1	Q8C196	NA	NA	NA	NA	NA	NA	NA	-1.34343	NA	NA	-1.45977	-1.72513
Q99LC5_216	Etfa	Q99LC5	NA	NA	NA	NA	NA	NA	NA	-1.2831	NA	NA	-1.04841	-1.80572
P29758_374	Oat	P29758	NA	NA	NA	NA	NA	NA	NA	-1.2398	NA	NA	NA	-1.11934
P32020_274	Scp2	P32020	NA	NA	NA	NA	NA	NA	NA	-1.23723	NA	NA	NA	-1.37614
P51174_254	Acadl	P51174	NA	NA	NA	NA	NA	NA	NA	-1.68628	NA	NA	NA	-2.42592
Q571F8_151	Gls2	Q571F8	NA	NA	NA	NA	NA	NA	NA	-1.91446	NA	NA	NA	-1.75717
Q8JZU2_268	Slc25a1	Q8JZU2	NA	NA	NA	NA	NA	NA	NA	-1.49888	NA	NA	NA	-1.88386
P29758_66	Oat	P29758	NA	NA	NA	NA	NA	NA	NA	-1.0115	NA	-1.03459	-1.26559	-1.13629
P56382_37_P56382_44	Atp5f1e	P56382	NA	NA	NA	NA	NA	NA	NA	-1.39758	NA	-1.16852	-1.33845	-1.83276
Q9DB20_176	Atp5po	Q9DB20	NA	NA	NA	NA	NA	NA	NA	-1.72537	NA	NA	-1.24841	NA
O08749_505	Dld	O08749	NA	NA	NA	NA	NA	NA	NA	-1.31489	NA	NA	-1.76414	NA
Q9WUM5_90	Suclg1	Q9WUM5	NA	NA	NA	NA	NA	NA	NA	-1.13441	NA	NA	-1.08019	NA
P62301_43	Rps13	P62301	NA	NA	NA	NA	NA	NA	NA	-1.08796	NA	NA	-1.39577	NA
Q922R8_368	Pdia6	Q922R8	NA	NA	NA	NA	NA	NA	NA	-1.0794	NA	NA	-1.47012	NA
Q99MR8_363	Mccc1	Q99MR8	NA	NA	NA	NA	NA	NA	NA	-1.13569	NA	NA	-1.2636	NA
Q9D2G2_153	Dlst	Q9D2G2	NA	NA	NA	NA	NA	NA	NA	-1.15493	NA	NA	-1.361	NA
P32020_177	Scp2	P32020	NA	NA	NA	NA	NA	NA	NA	-1.25186	-1.10413	NA	-1.60595	-1.00739
Q9CR68_168	Uqcrfs1	Q9CR68	NA	NA	NA	NA	NA	NA	NA	-1.21334	NA	NA	-1.40189	-1.12932
Q9D855_88	Uqcrb	Q9D855	NA	NA	NA	-1.27244	NA	NA	NA	-1.1143	NA	-1.63647	-1.38551	NA
Q8C196_728	Cps1	Q8C196	NA	NA	NA	NA	NA	NA	NA	-1.52065	-1.28413	-1.47534	-1.57615	NA
Q9DB20_84	Atp5po	Q9DB20	NA	NA	NA	NA	NA	NA	NA	-1.59427	-1.1571	-1.56871	-1.90866	-1.70562
P56480_259	Atp5f1b	P56480	NA	1.63496	1.78361	NA	NA	NA	NA	NA	NA	NA	-1.3497	NA
Q8BMS1_505	Hadha	Q8BMS1	NA	1.34987	1.79153	NA	NA	NA	NA	NA	NA	NA	-1.15598	NA
P54869_358	Hmgcs2	P54869	NA	1.33097	1.47534	NA	NA	NA	NA	NA	NA	NA	NA	NA
Q9CZ13_85	Uqcrc1	Q9CZ13	NA	1.35593	1.41112	NA	NA	NA	NA	NA	NA	NA	NA	NA
Q9DCM2_49	Gstk1	Q9DCM2	NA	1.58631	1.53535	NA	NA	NA	NA	NA	NA	NA	NA	NA
Q8C196_751	Cps1	Q8C196	NA	1.4546	1.60539	NA	NA	NA	NA	NA	NA	NA	NA	NA
Q9DCX2_48	Atp5pd	Q9DCX2	NA	1.51139	1.6329	NA	NA	NA	NA	NA	NA	NA	NA	NA
Q99L13_59	Hibadh	Q99L13	NA	2.02782	1.38701	NA	NA	NA	NA	NA	NA	NA	NA	NA
P11352_112	Gpx1	P11352	NA	1.77625	1.39764	NA	NA	NA	NA	NA	NA	NA	NA	NA
P51660_46	Hsd17b4	P51660	NA	1.7794	1.58997	NA	NA	NA	NA	NA	NA	NA	NA	NA
Q99LC3_228	Ndufa10	Q99LC3	NA	1.7737	1.16082	NA	NA	NA	NA	NA	NA	NA	NA	NA
Q9CZU6_375	Cs	Q9CZU6	NA	1.61051	1.3311	NA	NA	NA	NA	NA	NA	NA	NA	NA
Q6P3A8_292	Bckdhb	Q6P3A8	NA	1.43949	1.02854	NA	NA	NA	NA	NA	NA	NA	NA	NA
Q99LC5_126	Etfa	Q99LC5	NA	1.50549	1.11739	NA	NA	NA	NA	NA	NA	NA	NA	NA
Q9CQ62_49	Decr1	Q9CQ62	NA	1.24485	1.09695	NA	NA	NA	NA	NA	NA	NA	NA	NA
P52825_418	Cpt2	P52825	NA	1.11146	1.11074	NA	NA	NA	NA	NA	NA	NA	NA	NA
P54869_243	Hmgcs2	P54869	NA	1.14199	1.08818	NA	NA	NA	NA	NA	NA	NA	NA	NA
Q8C196_453	Cps1	Q8C196	NA	1.33438	1.18349	NA	NA	NA	NA	NA	NA	NA	NA	NA
Q8C196_458	Cps1	Q8C196	NA	1.26826	1.17014	NA	NA	NA	NA	NA	NA	NA	NA	NA
Q9D0S9_139	Hint2	Q9D0S9	NA	1.23777	1.24513	NA	NA	NA	NA	NA	NA	NA	NA	NA
P34914_508	Ephx2	P34914	NA	1.1944	1.20288	NA	NA	NA	NA	NA	NA	NA	NA	NA
Q91ZA3_554	Pcca	Q91ZA3	NA	1.22638	1.18243	NA	NA	NA	NA	NA	NA	NA	NA	NA
Q8C196_875	Cps1	Q8C196	NA	1.02424	1.29732	NA	NA	NA	NA	NA	NA	NA	NA	NA
Q99LB7_913	Sardh	Q99LB7	NA	1.00385	1.17683	NA	NA	NA	NA	NA	NA	NA	NA	NA
P54071_400	Idh2	P54071	NA	1.062	1.10259	NA	NA	NA	NA	NA	NA	NA	NA	NA
Q61425_192	Hadh	Q61425	NA	1.0244	1.11547	NA	NA	NA	NA	NA	NA	NA	NA	NA
P41216_641	Acsl1	P41216	NA	1.01513	1.48429	NA	NA	NA	NA	NA	NA	NA	NA	NA
Q9D2G2_278	Dlst	Q9D2G2	NA	1.01637	1.57923	NA	NA	NA	NA	NA	NA	NA	NA	NA
Q8R164_126	Bphl	Q8R164	NA	1.20674	1.45127	NA	NA	NA	NA	NA	NA	NA	NA	NA
P97450_94	Atp5pf	P97450	NA	1.08135	1.39289	NA	NA	NA	NA	NA	NA	NA	NA	NA
Q8BMS1_303	Hadha	Q8BMS1	NA	1.12509	1.43644	NA	NA	NA	NA	NA	NA	NA	NA	NA
Q8BWT1_234	Acaa2	Q8BWT1	NA	1.69644	1.84421	NA	NA	NA	NA	NA	-1.04738	NA	NA	NA
Q8K1R3_250	Pnpt1	Q8K1R3	NA	1.43312	2.17231	NA	NA	NA	NA	NA	NA	NA	NA	NA
Q8R164_243	Bphl	Q8R164	NA	1.2747	1.9097	NA	NA	NA	NA	NA	NA	NA	NA	NA
Q9CQ62_42	Decr1	Q9CQ62	NA	1.83458	2.19426	NA	NA	NA	NA	NA	NA	NA	NA	NA
Q9DB20_172	Atp5po	Q9DB20	NA	1.76038	2.11141	NA	NA	NA	NA	NA	NA	NA	NA	NA
Q91XE0_256	Glyat	Q91XE0	NA	1.98321	2.14913	NA	NA	NA	NA	NA	NA	NA	NA	NA
Q91YT0_81	Ndufv1	Q91YT0	NA	1.93084	2.00853	NA	NA	NA	NA	NA	NA	NA	NA	NA
P11725_231	Otc	P11725	NA	1.88119	1.85359	NA	NA	NA	NA	NA	NA	NA	NA	NA
Q64433_86	Hspe1	Q64433	NA	1.88676	1.7057	NA	NA	NA	NA	NA	NA	NA	NA	NA
P08249_314	Mdh2	P08249	NA	1.93775	1.69465	NA	NA	NA	NA	NA	NA	NA	NA	NA
Q60932_41	Vdac1	Q60932	NA	1.94048	1.70494	NA	NA	NA	NA	NA	NA	NA	NA	NA
Q9WUR2_90	Eci2	Q9WUR2	NA	1.66209	1.87321	NA	NA	NA	NA	NA	NA	NA	NA	NA
P54869_327	Hmgcs2	P54869	NA	1.71932	1.68811	NA	NA	NA	NA	NA	NA	NA	NA	NA
Q61586_779	Gpam	Q61586	NA	1.64763	1.72671	NA	NA	NA	NA	NA	NA	NA	NA	NA
P54869_437	Hmgcs2	P54869	NA	2.36345	2.3252	NA	NA	NA	NA	-1.59322	NA	NA	NA	NA
Q99LC5_139	Etfa	Q99LC5	NA	2.21837	2.05335	NA	NA	NA	NA	-1.80425	NA	NA	NA	NA
Q99J99_21	Mpst	Q99J99	NA	2.25057	1.04026	NA	NA	NA	NA	NA	NA	NA	NA	NA
Q3URE1_181	Acsf3	Q3URE1	NA	2.5439	1.49474	NA	NA	NA	NA	NA	NA	NA	NA	NA
Q61425_202	Hadh	Q61425	NA	2.40145	1.47678	NA	NA	NA	NA	NA	NA	NA	NA	NA
Q8C196_856	Cps1	Q8C196	NA	2.0949	1.84427	NA	NA	NA	NA	NA	NA	NA	NA	NA
Q921G7_415	Etfdh	Q921G7	NA	2.24952	1.67551	NA	NA	NA	NA	NA	NA	NA	NA	NA
P63038_462	Hspd1	P63038	NA	2.07109	1.56684	NA	NA	NA	NA	NA	NA	NA	NA	NA
Q3UEG6_419	Agxt2	Q3UEG6	NA	1.98459	1.67264	NA	NA	NA	NA	NA	NA	NA	NA	NA
Q8BIJ6_74	Iars2	Q8BIJ6	NA	2.0506	1.67651	NA	NA	NA	NA	NA	NA	NA	NA	NA
P05202_309	Got2	P05202	NA	2.19125	2.11744	NA	NA	NA	NA	NA	NA	NA	NA	NA
Q9CPP6_96	Ndufa5	Q9CPP6	NA	2.2011	2.12977	NA	NA	NA	NA	NA	NA	NA	NA	NA
O35658_88	C1qbp	O35658	NA	2.43458	1.97927	NA	NA	NA	NA	NA	NA	NA	NA	NA
Q99JY0_73	Hadhb	Q99JY0	NA	2.26063	1.97059	NA	NA	NA	NA	NA	NA	NA	NA	NA
Q8C196_287	Cps1	Q8C196	NA	3.08179	2.21558	NA	NA	NA	NA	NA	NA	NA	NA	NA
Q8QZT1_220	Acat1	Q8QZT1	NA	2.56963	2.19602	NA	NA	NA	NA	NA	NA	NA	NA	NA
Q99L13_296	Hibadh	Q99L13	NA	2.77377	2.25823	NA	NA	NA	NA	NA	NA	NA	NA	NA
Q64458_375	Cyp2c29	Q64458	NA	2.61111	2.76857	NA	NA	NA	NA	NA	NA	NA	NA	NA
Q9Z2I8_228	Suclg2	Q9Z2I8	NA	2.01307	2.61325	NA	NA	NA	NA	NA	NA	NA	NA	NA
Q91VA0_200	Acsm1	Q91VA0	NA	3.1446	2.51158	NA	1.60797	NA	NA	NA	NA	NA	NA	NA
Q91VA0_352	Acsm1	Q91VA0	NA	3.08073	2.57508	NA	1.13792	NA	NA	NA	NA	NA	NA	NA
P51881_23	Slc25a5	P51881	NA	2.25178	2.75316	NA	1.87818	NA	NA	NA	NA	NA	NA	NA
Q8C196_603	Cps1	Q8C196	NA	2.27295	1.73607	NA	1.78855	NA	NA	NA	NA	NA	NA	NA
Q8C196_560	Cps1	Q8C196	NA	2.07268	1.34667	-1.80216	1.25598	NA	NA	NA	NA	NA	NA	NA
Q91VD9_311	Ndufs1	Q91VD9	NA	1.84243	2.09959	NA	1.2146	NA	NA	NA	NA	NA	NA	NA
Q91VM9_222	Ppa2	Q91VM9	NA	1.9095	1.68401	NA	1.13376	NA	NA	NA	NA	NA	NA	NA
Q60930_75	Vdac2	Q60930	NA	1.40358	1.23932	NA	1.59047	NA	NA	NA	NA	NA	NA	NA
Q60932_237	Vdac1	Q60932	NA	1.78513	1.55913	NA	1.63549	NA	NA	NA	NA	NA	NA	NA
O08756_212	Hsd17b10	O08756	NA	3.41686	2.88678	-1.77266	NA	NA	NA	NA	NA	NA	NA	NA
Q03265_506	Atp5f1a	Q03265	NA	4.14599	2.33845	NA	NA	NA	NA	NA	NA	NA	NA	NA
Q99LB7_905	Sardh	Q99LB7	NA	1.3841	1.67286	-1.01539	NA	NA	NA	NA	NA	-1.15631	NA	-1.15466
Q8BWT1_137	Acaa2	Q8BWT1	NA	1.0227	1.33828	NA	NA	NA	NA	NA	NA	-1.08942	NA	NA
Q99KI0_138	Aco2	Q99KI0	NA	1.41807	1.74535	NA	NA	NA	NA	NA	NA	-1.52979	NA	NA
Q8QZT1_227	Acat1	Q8QZT1	NA	1.59614	1.60069	-1.8825	NA	NA	NA	NA	NA	NA	-1.56023	NA
Q8C196_522	Cps1	Q8C196	NA	2.26549	1.63408	-1.00457	NA	NA	NA	NA	NA	NA	NA	NA
Q8BMS1_326	Hadha	Q8BMS1	NA	2.52176	1.73562	-1.05563	NA	NA	NA	NA	NA	NA	NA	NA
Q9DB20_100	Atp5po	Q9DB20	NA	2.82846	1.72576	-1.12591	NA	NA	NA	NA	NA	NA	NA	NA
Q8BWT1_158	Acaa2	Q8BWT1	NA	1.638	1.93191	-1.5433	NA	NA	NA	NA	NA	NA	NA	NA
Q9DBT9_648	Dmgdh	Q9DBT9	NA	1.78437	1.9324	-1.45524	NA	NA	NA	NA	NA	NA	NA	NA
P05202_387	Got2	P05202	NA	2.36536	2.01925	-1.64014	NA	NA	NA	NA	NA	NA	NA	NA
Q5FW57_183	Gm4952	Q5FW57	NA	2.0078	2.05152	-1.2701	NA	NA	NA	NA	NA	NA	NA	NA
Q8BWF0_74	Aldh5a1	Q8BWF0	NA	1.51788	1.58776	-1.45834	NA	NA	NA	NA	NA	NA	NA	NA
Q9WTP7_80	Ak3	Q9WTP7	NA	1.12278	1.59972	-1.6192	NA	NA	NA	NA	NA	NA	NA	NA
Q91VT4_120	Cbr4	Q91VT4	NA	1.79756	1.37843	-1.28359	NA	NA	NA	NA	NA	NA	NA	NA
Q99K67_707	Aass	Q99K67	NA	1.82884	1.46615	-1.03224	NA	NA	NA	NA	NA	NA	NA	NA
Q9CZ13_248	Uqcrc1	Q9CZ13	NA	1.88409	1.6988	-1.10803	NA	NA	NA	NA	NA	NA	NA	NA
Q8C196_157	Cps1	Q8C196	NA	2.62037	2.11985	-1.46682	1.13897	NA	NA	NA	NA	NA	NA	-3.84866
Q9D855_96	Uqcrb	Q9D855	NA	3.01576	2.42419	-1.71718	NA	NA	NA	NA	NA	NA	NA	-3.61277
Q8BH95_115	Echs1	Q8BH95	NA	1.82112	1.35801	NA	NA	NA	NA	NA	NA	NA	NA	-2.33521
Q8C196_307	Cps1	Q8C196	NA	3.04098	1.6421	NA	NA	NA	NA	NA	NA	NA	NA	-2.83452
Q99LC5_85	Etfa	Q99LC5	NA	2.77955	2.37715	NA	NA	NA	NA	NA	NA	NA	NA	-2.58983
P05202_227	Got2	P05202	NA	2.97196	2.52375	NA	NA	NA	NA	-2.56065	NA	NA	NA	-2.39321
Q91VD9_98	Ndufs1	Q91VD9	NA	2.52782	NA	NA	NA	NA	NA	-1.86747	NA	NA	NA	-2.49195
Q8BMS1_334	Hadha	Q8BMS1	NA	NA	1.03024	NA	NA	1.09054	NA	NA	NA	NA	NA	-1.34973
Q8BVI4_121	Qdpr	Q8BVI4	NA	NA	NA	NA	NA	1.06983	NA	NA	NA	NA	NA	-1.48375
Q99L13_320	Hibadh	Q99L13	NA	NA	NA	NA	NA	NA	NA	NA	-1.41712	NA	NA	-1.77859
Q8BMS1_625	Hadha	Q8BMS1	NA	NA	NA	NA	NA	NA	NA	NA	-1.31081	NA	NA	-1.964
Q8K2B3_335	Sdha	Q8K2B3	NA	NA	NA	NA	NA	NA	NA	NA	-1.32882	NA	NA	-1.89948
P54869_276	Hmgcs2	P54869	NA	NA	NA	NA	NA	NA	NA	NA	-1.3906	NA	NA	-1.53293
Q9CZU6_393	Cs	Q9CZU6	NA	NA	NA	NA	NA	NA	NA	NA	-1.34689	NA	NA	-1.53049
Q05920_79	Pc	Q05920	NA	NA	NA	NA	NA	NA	NA	NA	-1.16069	NA	NA	-1.6349
Q8BMS1_295	Hadha	Q8BMS1	NA	NA	NA	NA	NA	NA	NA	NA	-1.24453	NA	NA	-1.74169
Q91W43_877	Gldc	Q91W43	NA	NA	NA	NA	NA	NA	NA	NA	-1.63931	NA	NA	-1.01408
P45952_212	Acadm	P45952	NA	NA	NA	NA	NA	NA	NA	NA	-1.09655	NA	NA	-1.39317
P38647_135	Hspa9	P38647	NA	NA	NA	NA	NA	NA	NA	NA	-1.00791	NA	NA	-1.22654
P38647_138	Hspa9	P38647	NA	NA	NA	NA	NA	NA	NA	NA	-1.14457	NA	NA	-1.17769
Q9CZU6_450	Cs	Q9CZU6	NA	NA	NA	NA	NA	NA	NA	NA	-1.15632	NA	NA	-1.25015
Q8C196_880	Cps1	Q8C196	-1.05189	NA	NA	NA	NA	NA	NA	NA	NA	NA	NA	-1.38775
O88986_42	Gcat	O88986	NA	NA	NA	NA	NA	NA	NA	NA	NA	NA	NA	-1.21843
Q03265_539	Atp5f1a	Q03265	NA	NA	NA	NA	NA	NA	NA	NA	NA	NA	NA	-1.21815
P56480_522	Atp5f1b	P56480	NA	NA	NA	NA	NA	NA	NA	NA	NA	NA	NA	-1.22532
Q9Z2I9_88	Sucla2	Q9Z2I9	NA	NA	NA	NA	NA	NA	NA	NA	NA	NA	NA	-1.22324
P51881_147	Slc25a5	P51881	NA	NA	NA	NA	NA	NA	NA	NA	NA	NA	NA	-1.20286
Q03265_175	Atp5f1a	Q03265	NA	NA	NA	NA	NA	NA	NA	NA	NA	NA	NA	-1.19601
Q8C196_831	Cps1	Q8C196	NA	NA	NA	NA	NA	NA	NA	NA	NA	NA	NA	-1.19172
P08113_593	Hsp90b1	P08113	NA	NA	NA	NA	NA	NA	NA	NA	NA	NA	NA	-1.30798
Q8BYL4_362	Yars2	Q8BYL4	NA	NA	NA	NA	NA	NA	NA	NA	NA	NA	NA	-1.25501
Q8CHT0_401	Aldh4a1	Q8CHT0	NA	NA	NA	NA	NA	NA	NA	NA	NA	NA	NA	-1.26156
Q91W43_982	Gldc	Q91W43	NA	NA	NA	NA	NA	NA	NA	NA	NA	NA	NA	-1.27273
P63038_130	Hspd1	P63038	NA	NA	NA	NA	NA	NA	NA	NA	NA	NA	NA	-1.27764
Q05920_1109	Pc	Q05920	NA	NA	NA	NA	NA	NA	NA	NA	NA	NA	NA	-1.27949
Q8C196_171	Cps1	Q8C196	NA	NA	NA	NA	NA	NA	NA	NA	NA	NA	NA	-1.27943
P41216_649	Acsl1	P41216	NA	NA	NA	NA	NA	NA	NA	NA	NA	NA	NA	-1.10302
P47738_385	Aldh2	P47738	NA	NA	NA	NA	NA	NA	NA	NA	NA	NA	NA	-1.10446
Q8BWF0_382	Aldh5a1	Q8BWF0	NA	NA	NA	NA	NA	NA	NA	NA	NA	NA	NA	-1.12765
Q9CQA3_263	Sdhb	Q9CQA3	NA	NA	NA	NA	NA	NA	NA	NA	NA	NA	NA	-1.12931
Q8C196_1479	Cps1	Q8C196	NA	NA	NA	NA	NA	NA	NA	NA	NA	NA	NA	-1.11504
Q9WTP6_62	Ak2	Q9WTP6	NA	NA	NA	NA	NA	NA	NA	NA	NA	NA	NA	-1.11321
P35486_244	Pdha1	P35486	NA	NA	NA	NA	NA	NA	NA	NA	NA	NA	NA	-1.12354
Q99JY0_202	Hadhb	Q99JY0	NA	NA	NA	NA	NA	NA	NA	NA	NA	NA	NA	-1.11897
Q9DBL1_284	Acadsb	Q9DBL1	NA	NA	NA	NA	NA	NA	NA	NA	NA	NA	NA	-1.11862
O35459_150	Ech1	O35459	NA	NA	NA	NA	NA	NA	NA	NA	NA	NA	NA	-1.14498
P47738_157	Aldh2	P47738	NA	NA	NA	NA	NA	NA	NA	NA	NA	NA	NA	-1.13752
P63038_75	Hspd1	P63038	NA	NA	NA	NA	NA	NA	NA	NA	NA	NA	NA	-1.17377
Q05920_1124	Pc	Q05920	NA	NA	NA	NA	NA	NA	NA	NA	NA	NA	NA	-1.16375
Q8C196_1356	Cps1	Q8C196	NA	NA	NA	NA	NA	NA	NA	NA	NA	NA	NA	-1.02413
O08749_143	Dld	O08749	NA	NA	NA	NA	NA	NA	NA	NA	NA	NA	NA	-1.03101
Q99K67_286	Aass	Q99K67	NA	NA	NA	NA	NA	NA	NA	NA	NA	NA	NA	-1.03245
P47738_370	Aldh2	P47738	NA	NA	NA	NA	NA	NA	NA	NA	NA	NA	NA	-1.01763
Q9CQN1_334	Trap1	Q9CQN1	NA	NA	NA	NA	NA	NA	NA	NA	NA	NA	NA	-1.01554
P58710_303	Gulo	P58710	NA	NA	NA	NA	NA	NA	NA	NA	NA	NA	NA	-1.01074
Q9WVD5_94	Slc25a15	Q9WVD5	NA	NA	NA	NA	NA	NA	NA	NA	NA	NA	NA	-1.00807
O08749_159	Dld	O08749	NA	NA	NA	NA	NA	NA	NA	NA	NA	NA	NA	-1.00654
Q8R086_88	Suox	Q8R086	NA	NA	NA	NA	NA	NA	NA	NA	NA	NA	NA	-1.00552
Q9CQ62_106	Decr1	Q9CQ62	NA	NA	NA	NA	NA	NA	NA	NA	NA	NA	NA	-1.08974
P38647_106	Hspa9	P38647	NA	NA	NA	NA	NA	NA	NA	NA	NA	NA	NA	-1.08535
P41216_522	Acsl1	P41216	NA	NA	NA	NA	NA	NA	NA	NA	NA	NA	NA	-1.08652
P56391_13	Cox6b1	P56391	NA	NA	NA	NA	NA	NA	NA	NA	NA	NA	NA	-1.08753
P41216_208	Acsl1	P41216	NA	NA	NA	NA	NA	NA	NA	NA	NA	NA	NA	-1.07489
Q8K1R3_591	Pnpt1	Q8K1R3	NA	NA	NA	NA	NA	NA	NA	NA	NA	NA	NA	-1.08184
P51174_92	Acadl	P51174	NA	NA	NA	NA	NA	NA	NA	NA	NA	NA	NA	-1.0645
Q9JLJ2_347	Aldh9a1	Q9JLJ2	NA	NA	NA	NA	NA	NA	NA	NA	NA	NA	NA	-1.04089
Q9Z2I9_108	Sucla2	Q9Z2I9	NA	NA	NA	NA	NA	NA	NA	NA	NA	NA	NA	-1.04473
Q9DBT9_201	Dmgdh	Q9DBT9	NA	NA	NA	NA	NA	NA	NA	NA	NA	NA	NA	-1.04309
P11725_238	Otc	P11725	NA	NA	NA	NA	NA	NA	NA	NA	NA	NA	NA	-1.04328
Q99KB8_123	Hagh	Q99KB8	NA	NA	NA	NA	NA	NA	NA	NA	NA	NA	NA	-1.04325
Q9D379_197	Ephx1	Q9D379	NA	NA	NA	NA	NA	NA	NA	NA	NA	NA	NA	-1.04828
O35943_189	Fxn	O35943	NA	NA	NA	NA	NA	NA	NA	NA	NA	NA	NA	-1.04759
Q9CRB9_173	Chchd3	Q9CRB9	NA	NA	NA	NA	NA	NA	NA	NA	NA	NA	NA	-1.04706
P41216_512	Acsl1	P41216	NA	NA	NA	NA	NA	NA	NA	NA	NA	NA	NA	-1.0503
Q99JY0_409	Hadhb	Q99JY0	NA	NA	NA	NA	NA	NA	NA	NA	NA	NA	NA	-1.05335
Q8C196_228	Cps1	Q8C196	NA	NA	NA	NA	NA	NA	NA	NA	NA	NA	NA	-2.05598
Q8QZT1_265	Acat1	Q8QZT1	NA	NA	NA	NA	NA	NA	NA	NA	NA	NA	NA	-2.11097
Q8C196_310	Cps1	Q8C196	NA	NA	NA	NA	NA	NA	NA	NA	NA	NA	NA	-1.50817
P29758_107	Oat	P29758	NA	NA	NA	NA	NA	NA	NA	NA	NA	NA	NA	-1.46358
P47738_513	Aldh2	P47738	NA	NA	NA	NA	NA	NA	NA	NA	NA	NA	NA	-1.4827
Q8BWF0_278	Aldh5a1	Q8BWF0	NA	NA	NA	NA	NA	NA	NA	NA	NA	NA	NA	-1.35402
Q8VDK1_148	Nit1	Q8VDK1	NA	NA	NA	NA	NA	NA	NA	NA	NA	NA	NA	-1.3713
P47738_371	Aldh2	P47738	NA	NA	NA	NA	NA	NA	NA	NA	NA	NA	NA	-1.40785
Q99KR7_90	Ppif	Q99KR7	NA	NA	NA	NA	NA	NA	NA	NA	NA	NA	NA	-1.41566
P54869_367	Hmgcs2	P54869	NA	NA	NA	NA	NA	NA	NA	NA	NA	NA	NA	-1.44516
Q9CQN1_264	Trap1	Q9CQN1	NA	NA	NA	NA	NA	NA	NA	NA	NA	NA	NA	-1.42899
Q8C196_210	Cps1	Q8C196	NA	NA	NA	NA	NA	NA	NA	NA	NA	NA	NA	-1.56595
Q9D172_221	Gatd3a	Q9D172	NA	NA	NA	NA	NA	NA	NA	NA	NA	NA	NA	-1.56829
P63038_389	Hspd1	P63038	NA	NA	NA	NA	NA	NA	NA	NA	NA	NA	NA	-1.61776
P41216_428	Acsl1	P41216	NA	NA	NA	NA	NA	NA	NA	NA	NA	NA	NA	-1.60604
Q8C196_841	Cps1	Q8C196	NA	NA	NA	NA	NA	NA	NA	NA	NA	NA	NA	-1.59631
Q05920_1119	Pc	Q05920	NA	NA	NA	NA	NA	NA	NA	NA	NA	NA	NA	-1.78836
Q8C196_908	Cps1	Q8C196	NA	NA	NA	NA	NA	NA	NA	NA	NA	NA	NA	-1.70821
P54071_272	Idh2	P54071	-1.05895	1.2289	1.42345	NA	NA	NA	NA	NA	NA	NA	NA	-1.20536
Q8QZT1_260	Acat1	Q8QZT1	-1.10048	NA	1.30935	NA	NA	NA	NA	NA	-1.44235	NA	NA	-1.2865
P09103_446	P4hb	P09103	NA	NA	1.06458	NA	NA	NA	NA	NA	NA	NA	-1.15991	-1.03301
P26443_545	Glud1	P26443	NA	NA	1.13488	NA	NA	NA	NA	NA	NA	NA	-1.02541	NA
Q9CZL5_120	Pcbd2	Q9CZL5	NA	NA	1.70451	NA	NA	NA	NA	NA	NA	NA	NA	-1.20301
P51174_81	Acadl	P51174	NA	NA	1.05132	NA	NA	NA	NA	NA	NA	NA	NA	-1.06659
Q9CXW4_67	Rpl11	Q9CXW4	NA	NA	1.04593	NA	NA	NA	NA	NA	NA	NA	NA	-1.01106
P08249_185	Mdh2	P08249	NA	NA	1.27439	NA	NA	NA	NA	NA	NA	NA	NA	NA
P20029_269	Hspa5	P20029	NA	NA	1.28302	NA	NA	NA	NA	NA	NA	NA	NA	NA
Q9D023_19	Mpc2	Q9D023	NA	NA	1.28694	NA	NA	NA	NA	NA	NA	NA	NA	NA
Q05920_1061	Pc	Q05920	NA	NA	1.31243	NA	NA	NA	NA	NA	NA	NA	NA	NA
Q9D1I5_62	Mcee	Q9D1I5	NA	NA	1.31821	NA	NA	NA	NA	NA	NA	NA	NA	NA
Q8BWF0_347	Aldh5a1	Q8BWF0	NA	NA	1.29336	NA	NA	NA	NA	NA	NA	NA	NA	NA
Q9DBM2_459	Ehhadh	Q9DBM2	NA	NA	1.29752	NA	NA	NA	NA	NA	NA	NA	NA	NA
Q9DCJ5_106	Ndufa8	Q9DCJ5	NA	NA	1.30128	NA	NA	NA	NA	NA	NA	NA	NA	NA
P51881_49_P51881_52	Slc25a5	P51881	NA	NA	1.34456	NA	NA	NA	NA	NA	NA	NA	NA	NA
Q91XE0_169	Glyat	Q91XE0	NA	NA	1.33226	NA	NA	NA	NA	NA	NA	NA	NA	NA
O88451_224	Rdh7	O88451	NA	NA	1.38193	NA	NA	NA	NA	NA	NA	NA	NA	NA
Q91ZA3_644	Pcca	Q91ZA3	NA	NA	1.40118	NA	NA	NA	NA	NA	NA	NA	NA	NA
Q9Z2Y8_99	Plpbp	Q9Z2Y8	NA	NA	1.02105	NA	NA	NA	NA	NA	NA	NA	NA	NA
P47740_296	Aldh3a2	P47740	NA	NA	1.02528	NA	NA	NA	NA	NA	NA	NA	NA	NA
Q9CPQ8_11	Atp5mg	Q9CPQ8	NA	NA	1.02334	NA	NA	NA	NA	NA	NA	NA	NA	NA
Q9DC61_298	Pmpca	Q9DC61	NA	NA	1.00069	NA	NA	NA	NA	NA	NA	NA	NA	NA
P26443_352	Glud1	P26443	NA	NA	1.00363	NA	NA	NA	NA	NA	NA	NA	NA	NA
Q8QZT1_178	Acat1	Q8QZT1	NA	NA	1.00359	NA	NA	NA	NA	NA	NA	NA	NA	NA
Q8K411_883	Pitrm1	Q8K411	NA	NA	1.01512	NA	NA	NA	NA	NA	NA	NA	NA	NA
Q8QZT1_75	Acat1	Q8QZT1	NA	NA	1.01049	NA	NA	NA	NA	NA	NA	NA	NA	NA
Q8BGT5_502	Gpt2	Q8BGT5	NA	NA	1.00763	NA	NA	NA	NA	NA	NA	NA	NA	NA
Q9D6M3_83	Slc25a22	Q9D6M3	NA	NA	1.00903	NA	NA	NA	NA	NA	NA	NA	NA	NA
Q8VCH0_237	Acaa1b	Q8VCH0	NA	NA	1.07027	NA	NA	NA	NA	NA	NA	NA	NA	NA
Q9D1I5_158	Mcee	Q9D1I5	NA	NA	1.0648	NA	NA	NA	NA	NA	NA	NA	NA	NA
P32020_432	Scp2	P32020	NA	NA	1.05378	NA	NA	NA	NA	NA	NA	NA	NA	NA
P05202_296_P05202_302	Got2	P05202	NA	NA	1.05027	NA	NA	NA	NA	NA	NA	NA	NA	NA
Q60766_280	Irgm1	Q60766	NA	NA	1.05184	NA	NA	NA	NA	NA	NA	NA	NA	NA
P41216_420	Acsl1	P41216	NA	NA	1.0346	NA	NA	NA	NA	NA	NA	NA	NA	NA
Q60932_265	Vdac1	Q60932	NA	NA	1.03708	NA	NA	NA	NA	NA	NA	NA	NA	NA
P05202_345	Got2	P05202	NA	NA	1.04081	NA	NA	NA	NA	NA	NA	NA	NA	NA
Q9JLT4_79	Txnrd2	Q9JLT4	NA	NA	1.04613	NA	NA	NA	NA	NA	NA	NA	NA	NA
Q91YT0_375	Ndufv1	Q91YT0	NA	NA	1.20304	NA	NA	NA	NA	NA	NA	NA	NA	NA
Q8K370_1052	Acad10	Q8K370	NA	NA	1.19369	NA	NA	NA	NA	NA	NA	NA	NA	NA
O55125_191	Nipsnap1	O55125	NA	NA	1.18732	NA	NA	NA	NA	NA	NA	NA	NA	NA
P16332_600	Mut	P16332	NA	NA	1.19	NA	NA	NA	NA	NA	NA	NA	NA	NA
P51881_272	Slc25a5	P51881	NA	NA	1.24958	NA	NA	NA	NA	NA	NA	NA	NA	NA
Q8BJ64_582	Chdh	Q8BJ64	NA	NA	1.25561	NA	NA	NA	NA	NA	NA	NA	NA	NA
P22315_142	Fech	P22315	NA	NA	1.23702	NA	NA	NA	NA	NA	NA	NA	NA	NA
Q9DB77_199	Uqcrc2	Q9DB77	NA	NA	1.22365	NA	NA	NA	NA	NA	NA	NA	NA	NA
Q9QXX4_485	Slc25a13	Q9QXX4	NA	NA	1.21956	NA	NA	NA	NA	NA	NA	NA	NA	NA
Q8QZT1_187	Acat1	Q8QZT1	NA	NA	1.11161	NA	NA	NA	NA	NA	NA	NA	NA	NA
Q9QXX4_663	Slc25a13	Q9QXX4	NA	NA	1.10895	NA	NA	NA	NA	NA	NA	NA	NA	NA
P38647_234	Hspa9	P38647	NA	NA	1.09433	NA	NA	NA	NA	NA	NA	NA	NA	NA
P63101_85	Ywhaz	P63101	NA	NA	1.0994	NA	NA	NA	NA	NA	NA	NA	NA	NA
Q8BMS1_540	Hadha	Q8BMS1	NA	NA	1.16259	NA	NA	NA	NA	NA	NA	NA	NA	NA
Q9DBW0_471	Cyp4v2	Q9DBW0	NA	NA	1.1689	NA	NA	NA	NA	NA	NA	NA	NA	NA
Q8BMS1_759	Hadha	Q8BMS1	NA	NA	1.13232	NA	NA	NA	NA	NA	NA	NA	NA	NA
P05202_122	Got2	P05202	NA	NA	1.13089	NA	NA	NA	NA	NA	NA	NA	NA	NA
P47738_80	Aldh2	P47738	NA	NA	1.13005	NA	NA	NA	NA	NA	NA	NA	NA	NA
P09671_68	Sod2	P09671	NA	NA	1.15295	NA	NA	NA	NA	NA	NA	NA	NA	NA
P55096_399	Abcd3	P55096	NA	NA	1.14151	NA	NA	NA	NA	NA	NA	NA	NA	NA
Q9CQX2_88	Cyb5b	Q9CQX2	NA	NA	1.14511	NA	NA	NA	NA	NA	NA	NA	NA	NA
Q9Z0X1_243	Aifm1	Q9Z0X1	NA	NA	1.14654	NA	NA	NA	NA	NA	NA	NA	NA	NA
P47738_75	Aldh2	P47738	NA	NA	1.14722	NA	NA	NA	NA	NA	NA	NA	NA	NA
Q9D6J6_60	Ndufv2	Q9D6J6	NA	NA	1.14773	NA	NA	NA	NA	NA	NA	NA	NA	NA
P41216_552	Acsl1	P41216	NA	NA	2.01446	NA	NA	NA	NA	NA	NA	NA	NA	NA
P52760_67	Rida	P52760	NA	NA	2.00566	NA	NA	NA	NA	NA	NA	NA	NA	NA
Q8VCW8_581	Acsf2	Q8VCW8	NA	NA	1.67355	NA	NA	NA	NA	NA	NA	NA	NA	NA
Q9DCY0_41	Keg1	Q9DCY0	NA	NA	1.68118	NA	NA	NA	NA	NA	NA	NA	NA	NA
P38647_360	Hspa9	P38647	NA	NA	1.45606	NA	NA	NA	NA	NA	NA	NA	NA	NA
Q5FW57_48	Gm4952	Q5FW57	NA	NA	1.45922	NA	NA	NA	NA	NA	NA	NA	NA	NA
P97823_224	Lypla1	P97823	NA	NA	1.46395	NA	NA	NA	NA	NA	NA	NA	NA	NA
Q07417_306	Acads	Q07417	NA	NA	1.47139	NA	NA	NA	NA	NA	NA	NA	NA	NA
Q8CFX1_205	H6pd	Q8CFX1	NA	NA	1.51447	NA	NA	NA	NA	NA	NA	NA	NA	NA
Q9Z2I9_438	Sucla2	Q9Z2I9	NA	NA	1.51693	NA	NA	NA	NA	NA	NA	NA	NA	NA
Q8BH59_403	Slc25a12	Q8BH59	NA	NA	1.5341	NA	NA	NA	NA	NA	NA	NA	NA	NA
Q9WTP6_34	Ak2	Q9WTP6	NA	NA	1.5492	NA	NA	NA	NA	NA	NA	NA	NA	NA
Q8VCH0_234	Acaa1b	Q8VCH0	NA	NA	1.02587	1.03711	1.23408	NA	NA	NA	NA	NA	NA	NA
Q9QXX4_18	Slc25a13	Q9QXX4	NA	NA	1.18386	1.00355	NA	NA	NA	NA	NA	NA	NA	NA
Q9WVA2_54	Timm8a1	Q9WVA2	NA	NA	1.13442	1.10106	NA	NA	NA	NA	NA	NA	NA	NA
O35129_250	Phb2	O35129	NA	1.01291	1.43963	2.03844	NA	NA	NA	NA	NA	NA	NA	NA
P55096_253	Abcd3	P55096	NA	NA	1.42319	2.03083	NA	NA	NA	NA	NA	NA	-1.11048	NA
Q91Y97_13	Aldob	Q91Y97	1.24586	NA	1.05573	1.61347	NA	NA	NA	NA	NA	NA	NA	-1.09179
P05202_302	Got2	P05202	1.71621	NA	1.80904	NA	NA	NA	NA	NA	NA	NA	NA	NA
P62889_26	Rpl30	P62889	1.49066	NA	NA	NA	NA	NA	NA	NA	NA	NA	NA	NA
Q5FW57_150	Gm4952	Q5FW57	-1.33107	NA	1.55949	-1.45847	NA	1.58757	NA	NA	NA	NA	NA	NA
Q8VCW8_614	Acsf2	Q8VCW8	-1.24345	NA	1.08537	-1.13234	NA	1.41706	NA	NA	NA	NA	NA	NA
Q8BWT1_209	Acaa2	Q8BWT1	-1.25731	NA	2.11856	NA	NA	1.16257	NA	NA	NA	NA	NA	NA
O08749_104	Dld	O08749	-1.26196	NA	1.0687	NA	NA	NA	NA	NA	NA	NA	NA	NA
O35459_316	Ech1	O35459	-1.16788	NA	1.00644	NA	NA	NA	NA	NA	NA	NA	NA	NA
Q9D1I5_152	Mcee	Q9D1I5	-1.08068	NA	1.04943	NA	NA	NA	NA	NA	NA	NA	NA	NA
Q9DCY0_140	Keg1	Q9DCY0	-1.36105	NA	1.47868	NA	NA	NA	NA	NA	NA	NA	NA	NA
Q9DB29_148	Iah1	Q9DB29	-1.10378	NA	1.63305	NA	NA	NA	NA	NA	NA	NA	NA	NA
Q9DCY0_235	Keg1	Q9DCY0	-1.19897	NA	1.57603	NA	NA	NA	NA	NA	NA	NA	NA	NA
P54869_350_P54869_354	Hmgcs2	P54869	NA	1.24831	1.51783	-1.41321	NA	1.08701	NA	NA	NA	NA	NA	NA
Q9WUM5_66	Suclg1	Q9WUM5	NA	1.02798	1.78458	NA	NA	1.15959	NA	NA	NA	NA	NA	NA
Q9WUM5_57	Suclg1	Q9WUM5	NA	NA	NA	NA	NA	1.20858	NA	NA	NA	NA	NA	NA
Q9WVD5_36	Slc25a15	Q9WVD5	NA	NA	NA	NA	NA	1.15009	NA	NA	NA	NA	NA	NA
Q8JZU2_265	Slc25a1	Q8JZU2	NA	NA	NA	NA	NA	1.0216	NA	NA	NA	NA	NA	NA
Q8K1Z0_170	Coq9	Q8K1Z0	NA	NA	NA	NA	NA	1.02361	NA	NA	NA	NA	NA	NA
Q9Z2I9_143	Sucla2	Q9Z2I9	NA	NA	NA	NA	NA	1.03833	NA	NA	NA	NA	NA	NA
Q9DCY0_194	Keg1	Q9DCY0	NA	NA	NA	NA	NA	1.03122	NA	NA	NA	NA	NA	NA
P03930_46	Mtatp8	P03930	NA	NA	NA	NA	NA	1.03037	NA	NA	NA	NA	NA	NA
Q9WUM5_54	Suclg1	Q9WUM5	NA	NA	NA	NA	NA	1.03026	NA	NA	NA	NA	NA	NA
Q9WUM5_94	Suclg1	Q9WUM5	NA	NA	NA	NA	NA	1.08538	NA	NA	NA	NA	NA	NA
Q9DC70_62	Ndufs7	Q9DC70	NA	NA	NA	NA	NA	1.04996	NA	NA	NA	NA	NA	NA
P54869_447	Hmgcs2	P54869	NA	NA	NA	NA	NA	1.0464	NA	NA	NA	NA	NA	NA
Q9WUM5_192	Suclg1	Q9WUM5	NA	NA	NA	NA	NA	1.04747	NA	NA	NA	NA	NA	NA
Q8BMS1_289	Hadha	Q8BMS1	NA	NA	NA	NA	NA	1.06638	NA	NA	NA	NA	NA	NA
Q8BMS1_406	Hadha	Q8BMS1	NA	NA	NA	NA	NA	1.06183	NA	NA	NA	NA	NA	NA
Q8JZU2_255	Slc25a1	Q8JZU2	NA	NA	NA	-1.22676	NA	1.38701	NA	NA	NA	NA	NA	NA
Q8VCW8_544	Acsf2	Q8VCW8	NA	NA	NA	-1.09941	NA	1.05886	NA	NA	NA	NA	NA	NA
Q8BMS1_390_Q8BMS1_406	Hadha	Q8BMS1	NA	NA	NA	-1.13657	NA	1.00224	NA	NA	NA	NA	NA	NA
Q8JZU2_160	Slc25a1	Q8JZU2	NA	NA	NA	-1.1094	NA	1.00152	NA	NA	NA	NA	NA	NA
P54869_83	Hmgcs2	P54869	NA	NA	1.43363	NA	NA	1.78938	NA	NA	NA	NA	NA	NA
Q9CQR4_13	Acot13	Q9CQR4	NA	NA	1.46724	NA	NA	2.05371	NA	NA	NA	NA	NA	NA
Q8BKZ9_194	Pdhx	Q8BKZ9	NA	NA	1.75765	NA	NA	1.32793	NA	NA	NA	NA	NA	NA
P52825_510	Cpt2	P52825	NA	NA	1.15994	NA	NA	1.42352	NA	NA	NA	NA	NA	NA
Q8K4F5_196	Abhd11	Q8K4F5	NA	NA	1.29191	NA	NA	1.47094	NA	NA	NA	NA	NA	NA
Q61694_362	Hsd3b5	Q61694	NA	NA	1.1868	NA	NA	1.05949	NA	NA	NA	NA	NA	NA
Q9WUM5_105	Suclg1	Q9WUM5	NA	NA	1.26184	NA	NA	1.29288	NA	NA	NA	NA	NA	NA
Q9WUM5_81	Suclg1	Q9WUM5	NA	NA	1.34436	NA	NA	1.1773	NA	NA	NA	NA	NA	NA
Q9WUR2_60	Eci2	Q9WUR2	NA	NA	1.34756	NA	NA	1.27619	NA	NA	NA	NA	NA	NA
Q9DCS3_252	Mecr	Q9DCS3	NA	NA	1.11112	-1.03387	NA	NA	NA	NA	NA	NA	NA	NA
O35459_76	Ech1	O35459	NA	NA	1.03236	-1.0449	NA	NA	NA	NA	NA	NA	NA	NA
Q8C196_875_Q8C196_880	Cps1	Q8C196	NA	NA	1.01814	-1.04651	NA	NA	NA	NA	NA	NA	NA	NA
Q9WTP7_171	Ak3	Q9WTP7	NA	NA	1.24139	-1.16925	NA	NA	NA	NA	NA	NA	NA	NA
Q99KI0_605	Aco2	Q99KI0	NA	NA	1.2328	-1.06311	NA	NA	NA	NA	NA	NA	NA	NA
Q9DB20_97	Atp5po	Q9DB20	NA	NA	1.30806	-1.06102	NA	NA	NA	NA	NA	NA	NA	NA
P52196_175	Tst	P52196	NA	NA	1.66531	-1.14905	NA	1.3246	NA	NA	NA	NA	NA	NA
Q05920_1096	Pc	Q05920	NA	NA	1.22244	-1.41174	NA	1.41073	NA	NA	NA	NA	NA	NA
P38647_567	Hspa9	P38647	NA	NA	1.09342	-1.10926	NA	1.12476	NA	NA	NA	NA	NA	NA
Q80XN0_103	Bdh1	Q80XN0	NA	NA	1.23411	-1.22249	NA	1.10868	NA	NA	NA	NA	NA	NA
Q9CQ69_33	Uqcrq	Q9CQ69	NA	NA	1.57828	NA	NA	NA	NA	NA	NA	-2.05499	-1.73465	NA
Q9QXX4_406	Slc25a13	Q9QXX4	NA	NA	1.28495	NA	NA	NA	NA	NA	NA	-1.53863	-1.73124	NA
P11725_292	Otc	P11725	NA	NA	1.38583	NA	NA	1.10332	NA	NA	NA	-1.13694	-1.18538	NA
P52196_14	Tst	P52196	NA	NA	1.33958	NA	NA	NA	NA	NA	NA	-1.05305	-1.01965	NA
Q8CHT0_129	Aldh4a1	Q8CHT0	NA	NA	1.36846	NA	NA	NA	-1.20768	NA	NA	-1.6319	NA	NA
P26443_480	Glud1	P26443	NA	NA	1.11666	NA	NA	1.33047	NA	NA	NA	-1.45325	NA	NA
Q9CR21_88	Ndufab1	Q9CR21	NA	NA	1.0998	-1.0592	NA	NA	NA	NA	NA	-1.42118	NA	NA
Q05920_316	Pc	Q05920	NA	NA	1.2443	NA	NA	NA	NA	NA	NA	-1.27281	NA	NA
Q8BMS1_516	Hadha	Q8BMS1	NA	NA	1.17074	NA	NA	NA	NA	NA	NA	-1.26323	NA	NA
Q91WS0_68	Cisd1	Q91WS0	NA	NA	1.1564	NA	NA	NA	NA	NA	NA	-1.26555	NA	NA
Q8QZT1_63	Acat1	Q8QZT1	NA	NA	1.3331	-2.08808	NA	NA	NA	NA	NA	NA	-1.22797	NA
Q8K2B3_538	Sdha	Q8K2B3	NA	NA	1.61223	-2.53581	NA	NA	NA	NA	NA	NA	NA	NA
Q9DB20_158	Atp5po	Q9DB20	NA	NA	1.5019	-2.24083	NA	NA	NA	NA	NA	NA	NA	NA
P56480_480	Atp5f1b	P56480	NA	NA	2.01481	-2.18029	NA	NA	NA	NA	NA	NA	NA	NA
Q91VA0_527	Acsm1	Q91VA0	NA	NA	1.74993	-1.99927	NA	NA	NA	NA	NA	NA	NA	NA
Q9DCX2_99	Atp5pd	Q9DCX2	NA	NA	1.08824	-1.17858	NA	NA	NA	NA	NA	-2.00796	NA	-1.72775
P56382_28	Atp5f1e	P56382	NA	NA	NA	-1.12218	NA	NA	NA	NA	NA	-1.07093	NA	NA
Q9D855_45	Uqcrb	Q9D855	NA	NA	NA	-1.08862	NA	NA	NA	NA	NA	-1.21699	NA	NA
P46656_70	Fdx1	P46656	NA	NA	NA	-1.22739	NA	NA	-1.36711	NA	NA	-1.24277	NA	NA
P63038_249	Hspd1	P63038	NA	NA	NA	-1.01153	NA	NA	-1.06949	NA	NA	-1.35078	NA	NA
P29758_102	Oat	P29758	NA	NA	NA	-1.12131	NA	NA	NA	NA	NA	NA	NA	-1.49322
Q61102_350	Abcb7	Q61102	NA	NA	NA	-1.03113	NA	NA	NA	NA	NA	NA	NA	-1.06395
Q60932_109	Vdac1	Q60932	NA	NA	NA	-1.83562	NA	NA	NA	NA	NA	NA	NA	NA
Q6P3A8_230	Bckdhb	Q6P3A8	NA	NA	NA	-1.81831	NA	NA	NA	NA	NA	NA	NA	NA
Q9WTP7_165	Ak3	Q9WTP7	NA	NA	NA	-1.10273	NA	NA	NA	NA	NA	NA	NA	NA
Q8VEM8_94	Slc25a3	Q8VEM8	NA	NA	NA	-1.11335	NA	NA	NA	NA	NA	NA	NA	NA
Q99KR7_85	Ppif	Q99KR7	NA	NA	NA	-1.10888	NA	NA	NA	NA	NA	NA	NA	NA
Q9WUR9_186	Ak4	Q9WUR9	NA	NA	NA	-1.00504	NA	NA	NA	NA	NA	NA	NA	NA
Q6PB66_291	Lrpprc	Q6PB66	NA	NA	NA	-1.01405	NA	NA	NA	NA	NA	NA	NA	NA
Q9DCX2_78	Atp5pd	Q9DCX2	NA	NA	NA	-1.01557	NA	NA	NA	NA	NA	NA	NA	NA
O35459_147	Ech1	O35459	NA	NA	NA	-1.06583	NA	NA	NA	NA	NA	NA	NA	NA
Q91XE0_267	Glyat	Q91XE0	NA	NA	NA	-1.03355	NA	NA	NA	NA	NA	NA	NA	NA
O08749_132_O08749_143	Dld	O08749	NA	NA	NA	-1.03074	NA	NA	NA	NA	NA	NA	NA	NA
Q9DCX2_117	Atp5pd	Q9DCX2	NA	NA	NA	-1.03099	NA	NA	NA	NA	NA	NA	NA	NA
Q8K215_88	Lyrm4	Q8K215	NA	NA	NA	-1.04675	NA	NA	NA	NA	NA	NA	NA	NA
Q9CZU6_327	Cs	Q9CZU6	NA	NA	NA	-1.04267	NA	NA	NA	NA	NA	NA	NA	NA
P56382_21	Atp5f1e	P56382	NA	NA	NA	-1.3468	NA	NA	NA	NA	NA	NA	NA	NA
P42125_242_P42125_255	Eci1	P42125	NA	NA	NA	-1.39398	NA	NA	NA	NA	NA	NA	NA	NA
Q6PB66_294	Lrpprc	Q6PB66	NA	NA	NA	-1.42521	NA	NA	NA	NA	NA	NA	NA	NA
P56382_37	Atp5f1e	P56382	NA	NA	NA	-1.30253	NA	NA	NA	NA	NA	NA	NA	NA
P54071_442	Idh2	P54071	NA	NA	NA	-1.26349	NA	NA	NA	NA	NA	NA	NA	NA
P42125_247_P42125_255	Eci1	P42125	NA	NA	NA	-1.27469	NA	NA	NA	NA	NA	NA	NA	NA
Q8R164_184	Bphl	Q8R164	NA	NA	NA	-1.28441	NA	NA	NA	NA	NA	NA	NA	NA
Q9D7N3_174	Mrps9	Q9D7N3	NA	NA	NA	-1.23041	NA	NA	NA	NA	NA	NA	NA	NA
P52503_41	Ndufs6	P52503	NA	NA	NA	-1.18296	NA	NA	NA	NA	NA	NA	NA	NA
Q9CQN1_326	Trap1	Q9CQN1	NA	NA	NA	-1.20582	NA	NA	NA	NA	NA	NA	NA	NA
O35423_256	Agxt	O35423	NA	NA	NA	NA	NA	NA	NA	NA	-1.64541	-1.29951	NA	NA
P48962_43	Slc25a4	P48962	NA	NA	NA	NA	NA	NA	NA	NA	NA	-1.29904	NA	-1.10124
Q8BMS1_664	Hadha	Q8BMS1	NA	NA	NA	NA	NA	NA	NA	NA	NA	-1.09091	NA	NA
P24270_504	Cat	P24270	NA	NA	NA	NA	NA	NA	NA	NA	NA	-1.00159	NA	NA
Q99MR8_180	Mccc1	Q99MR8	NA	NA	NA	NA	NA	NA	NA	NA	NA	-1.00119	NA	NA
O55125_143	Nipsnap1	O55125	NA	NA	NA	NA	NA	NA	NA	NA	NA	-1.4106	NA	NA
Q8BWT1_191	Acaa2	Q8BWT1	NA	NA	NA	NA	NA	NA	NA	NA	NA	-1.2788	NA	NA
Q9CQH3_58	Ndufb5	Q9CQH3	NA	NA	NA	NA	NA	NA	NA	NA	NA	-1.26749	NA	NA
P63038_191	Hspd1	P63038	NA	NA	NA	NA	NA	NA	NA	NA	NA	-1.31014	NA	NA
Q8JZU2_97	Slc25a1	Q8JZU2	NA	NA	NA	NA	NA	NA	NA	NA	NA	-1.33842	NA	NA
P61358_126	Rpl27	P61358	NA	NA	NA	NA	NA	NA	1.70051	NA	-1.00906	NA	NA	NA
Q8K2B3_179	Sdha	Q8K2B3	NA	NA	NA	NA	NA	1.06697	NA	NA	-1.25574	NA	NA	NA
Q91W43_653	Gldc	Q91W43	NA	NA	NA	NA	NA	NA	NA	NA	-1.02515	NA	NA	NA
Q99K67_138	Aass	Q99K67	NA	NA	NA	NA	NA	NA	NA	NA	-1.02383	NA	NA	NA
P53395_265	Dbt	P53395	NA	NA	NA	NA	NA	NA	NA	NA	-1.03952	NA	NA	NA
Q9DCW4_248	Etfb	Q9DCW4	NA	NA	NA	NA	NA	NA	NA	NA	-1.03722	NA	NA	NA
P52196_237	Tst	P52196	NA	NA	NA	NA	NA	NA	NA	NA	-1.05832	NA	NA	NA
Q8C196_1291	Cps1	Q8C196	NA	NA	NA	NA	NA	NA	NA	NA	-1.09208	NA	NA	NA
Q91VA0_534	Acsm1	Q91VA0	NA	NA	NA	NA	NA	NA	NA	NA	-1.22305	NA	NA	NA
O35423_322	Agxt	O35423	NA	NA	NA	NA	NA	NA	NA	NA	-1.37349	NA	NA	NA
P54869_350	Hmgcs2	P54869	NA	NA	NA	NA	NA	NA	NA	NA	-1.40466	NA	NA	NA
Q9D2G2_273	Dlst	Q9D2G2	NA	NA	NA	NA	NA	NA	NA	2.22583	NA	NA	NA	NA
P19536_120	Cox5b	P19536	NA	NA	NA	NA	NA	NA	NA	1.68553	NA	NA	NA	NA
Q9DCY0_126	Keg1	Q9DCY0	NA	NA	NA	NA	NA	NA	NA	1.22494	NA	NA	NA	NA
Q61694_60	Hsd3b5	Q61694	NA	NA	NA	NA	2.22479	NA	NA	NA	NA	NA	NA	NA
Q8C196_840	Cps1	Q8C196	NA	-2.19105	NA	NA	NA	NA	NA	NA	NA	NA	NA	NA
Q99LC5_294	Etfa	Q99LC5	NA	-1.52519	NA	NA	NA	NA	NA	NA	NA	NA	NA	NA
Q91VR2_154	Atp5f1c	Q91VR2	-1.14526	NA	NA	NA	NA	NA	NA	NA	NA	-1.02555	NA	NA
Q14DH7_519	Acss3	Q14DH7	-1.01885	NA	NA	NA	NA	NA	NA	NA	NA	NA	NA	NA
Q9CZS1_428	Aldh1b1	Q9CZS1	-1.34245	NA	NA	NA	NA	NA	NA	NA	NA	NA	NA	NA
P97872_394	Fmo5	P97872	-1.19242	NA	NA	NA	NA	NA	NA	NA	NA	NA	NA	NA
Q9DBT9_427	Dmgdh	Q9DBT9	-1.18762	NA	NA	NA	NA	NA	NA	NA	NA	NA	NA	NA
Q99KI0_228	Aco2	Q99KI0	NA	NA	NA	NA	NA	NA	NA	NA	NA	1.46513	NA	NA
Q9CQ75_46	Ndufa2	Q9CQ75	NA	NA	NA	NA	NA	NA	NA	NA	NA	1.52767	NA	NA
P11352_119	Gpx1	P11352	NA	NA	NA	NA	NA	NA	NA	NA	NA	NA	NA	1.21333
Q8QZT1_121	Acat1	Q8QZT1	NA	NA	NA	NA	NA	-1.02933	NA	NA	NA	NA	NA	NA
P09103_67	P4hb	P09103	NA	NA	NA	NA	-1.0971	NA	NA	NA	NA	NA	NA	NA
P50136_353	Bckdha	P50136	NA	NA	NA	NA	-1.20137	NA	NA	NA	NA	NA	NA	NA
O35423_330	Agxt	O35423	NA	NA	NA	NA	NA	NA	NA	-1.53998	-1.79711	NA	NA	NA
P16460_121	Ass1	P16460	NA	NA	NA	NA	NA	NA	NA	-1.93613	-2.31499	NA	NA	NA
O35423_334	Agxt	O35423	NA	NA	NA	NA	NA	NA	NA	-1.11852	-1.2372	NA	NA	NA
Q9EQ20_376	Aldh6a1	Q9EQ20	NA	NA	NA	NA	NA	NA	NA	-1.37324	-1.37314	NA	NA	-1.50331
Q9CYW4_15	Hdhd3	Q9CYW4	NA	NA	1.16223	NA	NA	NA	-1.19648	-1.25577	NA	NA	NA	NA
Q8CAQ8_498	Immt	Q8CAQ8	NA	NA	NA	NA	NA	NA	-1.06307	NA	-1.05711	NA	NA	NA
Q9CZS1_83	Aldh1b1	Q9CZS1	NA	NA	NA	NA	NA	NA	-1.31879	NA	-1.13917	NA	NA	NA
P62717_11	Rpl18a	P62717	NA	NA	NA	NA	NA	NA	-1.01692	-1.00059	NA	NA	NA	NA
Q8BIJ6_479	Iars2	Q8BIJ6	NA	NA	NA	NA	NA	NA	-1.38458	NA	NA	NA	NA	NA
Q9D7J9_76	Echdc3	Q9D7J9	NA	NA	NA	NA	NA	NA	-1.276	NA	NA	NA	NA	NA
Q60759_371	Gcdh	Q60759	NA	NA	NA	NA	NA	NA	-1.24558	NA	NA	NA	NA	NA
Q9EP89_288	Lactb	Q9EP89	NA	NA	NA	NA	NA	NA	-1.25761	NA	NA	NA	NA	NA
Q9CZS1_53	Aldh1b1	Q9CZS1	NA	NA	NA	NA	NA	NA	-1.04611	NA	NA	NA	NA	NA
P62301_34	Rps13	P62301	NA	NA	NA	NA	NA	NA	-1.00683	NA	NA	NA	NA	NA
Q80XN0_78	Bdh1	Q80XN0	NA	NA	NA	NA	NA	NA	-1.00477	NA	NA	NA	NA	NA
P47738_54	Aldh2	P47738	NA	NA	NA	NA	NA	NA	-1.17525	NA	NA	NA	NA	NA
Q8QZT1_370	Acat1	Q8QZT1	NA	NA	NA	NA	NA	NA	-1.15745	NA	NA	NA	NA	NA
Q9CPQ1_61	Cox6c	Q9CPQ1	NA	NA	NA	NA	NA	NA	-1.12306	NA	NA	NA	NA	NA
P97807_112	Fh	P97807	NA	NA	NA	NA	NA	NA	-1.10355	NA	NA	NA	NA	NA
Q8BWT1_241	Acaa2	Q8BWT1	NA	NA	NA	NA	NA	NA	-1.09321	NA	NA	NA	NA	NA
Q8VEM8_229	Slc25a3	Q8VEM8	NA	NA	NA	NA	NA	NA	NA	-2.71301	NA	NA	NA	NA
Q9CQ75_75	Ndufa2	Q9CQ75	NA	NA	NA	NA	NA	NA	NA	-1.1122	NA	NA	NA	NA
Q9JHI5_65	Ivd	Q9JHI5	NA	NA	NA	NA	NA	NA	NA	-1.06154	NA	NA	NA	NA
P56480_264	Atp5f1b	P56480	NA	NA	NA	NA	NA	NA	NA	-1.17888	NA	NA	NA	NA
Q07417_208	Acads	Q07417	NA	NA	NA	NA	NA	NA	NA	-1.23502	NA	NA	NA	NA
Q3TL44_659	Nlrx1	Q3TL44	NA	NA	NA	NA	NA	NA	NA	-1.24666	NA	NA	NA	NA
Q3UEG6_303	Agxt2	Q3UEG6	NA	NA	NA	NA	NA	NA	NA	-1.56535	NA	NA	NA	NA
O55125_193	Nipsnap1	O55125	NA	NA	NA	NA	NA	NA	NA	-1.37147	NA	NA	NA	NA
P50171_171	Hsd17b8	P50171	NA	NA	NA	NA	NA	NA	NA	-1.28734	NA	NA	NA	NA
P54071_67	Idh2	P54071	NA	NA	NA	NA	NA	NA	NA	-1.31506	NA	NA	NA	NA
P46656_86	Fdx1	P46656	NA	NA	NA	NA	NA	NA	-1.36885	-1.30329	NA	-1.02662	NA	NA
Q9DCX2_85	Atp5pd	Q9DCX2	NA	NA	NA	NA	NA	NA	NA	-1.37118	NA	-1.38889	NA	NA
Q61425_136	Hadh	Q61425	-1.44369	1.37682	NA	-1.50721	NA	-1.2692	NA	NA	NA	NA	NA	NA
Q8BFR5_418	Tufm	Q8BFR5	NA	1.5515	NA	1.43834	NA	1.25888	NA	NA	NA	NA	NA	NA
Q99LB7_374	Sardh	Q99LB7	NA	1.13414	NA	1.34274	NA	NA	NA	NA	NA	NA	NA	NA
P54071_80	Idh2	P54071	NA	1.52876	NA	-1.52624	NA	NA	NA	NA	NA	NA	NA	NA
Q9WTP7_29_Q9WTP7_34	Ak3	Q9WTP7	NA	1.36999	NA	-1.10827	NA	NA	NA	NA	NA	NA	NA	NA
Q8BMS1_493	Hadha	Q8BMS1	NA	1.13968	NA	NA	NA	NA	NA	NA	NA	NA	NA	NA
Q9QYR9_83	Acot2	Q9QYR9	NA	1.12102	NA	NA	NA	NA	NA	NA	NA	NA	NA	NA
Q8QZT1_335	Acat1	Q8QZT1	NA	1.04186	NA	NA	NA	NA	NA	NA	NA	NA	NA	NA
Q9CZU6_370	Cs	Q9CZU6	NA	1.03633	NA	NA	NA	NA	NA	NA	NA	NA	NA	NA
Q80ZS3_159	Mrps26	Q80ZS3	NA	1.0813	NA	NA	NA	NA	NA	NA	NA	NA	NA	NA
Q9DCM2_177	Gstk1	Q9DCM2	NA	1.09418	NA	NA	NA	NA	NA	NA	NA	NA	NA	NA
Q66GT5_85	Ptpmt1	Q66GT5	NA	1.34222	NA	NA	NA	NA	NA	NA	NA	NA	NA	NA
Q9CQQ7_225_Q9CQQ7_233	Atp5pb	Q9CQQ7	NA	1.2062	NA	NA	NA	NA	NA	NA	NA	NA	NA	NA
P16332_333	Mut	P16332	NA	1.24357	NA	NA	NA	NA	NA	NA	NA	NA	NA	NA
Q9DBG1_271	Cyp27a1	Q9DBG1	NA	1.22976	NA	NA	NA	NA	NA	NA	NA	NA	NA	NA
Q9JHI5_260	Ivd	Q9JHI5	NA	1.64975	NA	NA	NA	NA	NA	NA	NA	NA	NA	NA
P58281_834	Opa1	P58281	NA	1.99536	NA	NA	NA	NA	NA	NA	NA	NA	NA	NA
Q8BH95_228	Echs1	Q8BH95	NA	1.88237	NA	NA	NA	NA	NA	NA	NA	NA	NA	NA
Q8C196_1486	Cps1	Q8C196	NA	1.24205	NA	NA	NA	NA	-1.43392	NA	-1.54923	-1.41473	NA	-1.65145
Q9CZL5_131	Pcbd2	Q9CZL5	NA	1.52767	1.73567	NA	NA	NA	-1.97769	NA	NA	NA	NA	-1.93496
Q99J99_40	Mpst	Q99J99	NA	1.6059	2.04368	NA	NA	NA	-1.11346	NA	NA	NA	NA	NA
Q9WVM8_339	Aadat	Q9WVM8	NA	1.54293	1.84533	NA	NA	NA	-1.1375	NA	NA	NA	NA	NA
Q99L13_148	Hibadh	Q99L13	NA	1.39326	1.31711	NA	NA	NA	-1.2033	NA	NA	NA	NA	NA
P19783_60	Cox4i1	P19783	NA	1.07254	1.33726	NA	NA	NA	-1.14236	NA	NA	NA	NA	NA
Q9DCY0_266	Keg1	Q9DCY0	NA	1.04203	1.1885	NA	NA	NA	-1.2202	NA	NA	NA	NA	NA
P47738_161	Aldh2	P47738	NA	2.93554	NA	NA	NA	NA	-1.10578	-1.14296	NA	NA	NA	NA
Q9DCM2_116	Gstk1	Q9DCM2	NA	1.80764	1.08236	NA	NA	NA	-1.00033	-1.61801	NA	NA	-1.43655	-1.63408
P08249_239	Mdh2	P08249	-1.1618	NA	1.5516	NA	NA	1.39165	NA	-1.29535	-1.57805	NA	NA	-1.56072
Q5FW57_256	Gm4952	Q5FW57	NA	1.24079	1.1825	NA	NA	NA	NA	-1.39365	-1.60681	NA	NA	NA
Q7TNE1_423	Sugct	Q7TNE1	NA	1.47748	1.08597	NA	NA	NA	NA	-1.42659	NA	NA	NA	NA
Q9DBT9_516	Dmgdh	Q9DBT9	NA	1.38326	1.26673	NA	NA	NA	NA	-1.28755	NA	NA	NA	NA
Q07417_51	Acads	Q07417	NA	1.83211	1.78464	NA	NA	NA	NA	-2.44496	-2.57032	NA	NA	NA
P70404_226	Idh3g	P70404	NA	1.85197	1.30274	NA	NA	NA	NA	NA	-1.79795	NA	NA	NA
Q9CZ13_111	Uqcrc1	Q9CZ13	NA	2.67045	1.55151	NA	NA	NA	NA	NA	-2.15607	NA	NA	NA
Q61694_70	Hsd3b5	Q61694	NA	1.57749	1.02627	NA	1.74006	NA	1.65803	1.12281	NA	1.23462	1.69194	NA
P01942_57	Hba	P01942	NA	NA	NA	NA	NA	NA	NA	2.13525	1.89746	1.83329	2.01511	NA
P02088_67	Hbb-b1	P02088	NA	NA	NA	NA	NA	NA	NA	NA	NA	1.71531	1.54543	1.36278
Q8R3F5_290	Mcat	Q8R3F5	NA	NA	NA	NA	NA	NA	NA	NA	NA	1.11835	1.42659	NA
Q8K2C6_203	Sirt5	Q8K2C6	NA	NA	NA	NA	NA	NA	NA	NA	NA	NA	1.51311	NA
Q61694_175	Hsd3b5	Q61694	NA	NA	NA	NA	NA	NA	NA	NA	NA	NA	1.07122	NA
P01942_12	Hba	P01942	NA	NA	NA	NA	NA	NA	NA	NA	NA	NA	1.23362	NA
Q61694_164	Hsd3b5	Q61694	NA	NA	NA	NA	NA	NA	NA	NA	NA	NA	1.24612	NA
Q3TC72_128	Fahd2	Q3TC72	NA	NA	NA	NA	NA	NA	1.8442	NA	NA	2.2641	1.42906	NA
P01942_17	Hba	P01942	NA	NA	NA	NA	NA	NA	1.0953	1.30661	1.20016	2.0584	1.71687	NA
Q9CPQ8_24	Atp5mg	Q9CPQ8	NA	NA	NA	NA	NA	NA	1.31921	1.74908	NA	2.76159	1.84249	NA
Q03265_167	Atp5f1a	Q03265	NA	1.4476	1.30929	4.14632	2.64759	1.58458	NA	1.57412	NA	2.05664	NA	NA
Q9D6R2_100	Idh3a	Q9D6R2	NA	2.38851	1.39181	2.20298	2.00651	1.28291	NA	1.88637	NA	2.2519	1.18289	NA
Q61694_60_Q61694_70	Hsd3b5	Q61694	NA	1.28061	1.32816	NA	2.64199	1.88964	NA	NA	NA	NA	NA	NA
Q8BWT1_171	Acaa2	Q8BWT1	1.03806	1.73199	1.80685	2.11556	1.94839	NA	NA	NA	NA	NA	NA	NA
P97807_63	Fh	P97807	1.29426	2.2129	1.37508	3.0029	1.62209	1.70229	NA	NA	NA	NA	NA	NA
Q9DBL1_278	Acadsb	Q9DBL1	1.00313	2.07015	1.22117	2.18504	1.47827	1.20875	NA	NA	NA	1.03578	NA	NA
